# Supplementary material
Source: HighWire-hosted journal article supplement (https://www.cmajopen.ca/highwire/filestream/81016/field_highwire_adjunct_files/0/open-2016-0114-1-at.pdf)
Supplement: open-2016-0114-1-at.pdf [file open-2016-0114-1-at.pdf]

**Appendix 1 (as supplied by the authors): Interview recruitment categories**

|                                   | <b>Non-clinician scientists</b> | <b>Clinician scientists</b> |
|-----------------------------------|---------------------------------|-----------------------------|
| <b>Early career (&lt;5 years)</b> | <b>4-6</b>                      | <b>4-6</b>                  |
| <b>Mid career (5 – 10 years)</b>  | <b>4-6</b>                      | <b>4-6</b>                  |
| <b>Late career (&gt;10 years)</b> | <b>4-6</b>                      | <b>4-6</b>                  |
